# 1 Manganese is a Physiologically Relevant TORC1 Activator in Yeast and 2 Mammals

3 Raffaele Nicastro<sup>1,4</sup> H  l  ne Gaillard<sup>1,2,3</sup>, Laura Zarzuela<sup>2</sup>, Marie-Pierre P  li-Gulli<sup>4</sup>, Elisabet Fern  ndez-  
4 Garc  a<sup>2,3</sup>, Mercedes Tom  <sup>2</sup>, N  stor Garc  a-Rodr  guez<sup>2,3</sup>, Ra  l V. D  ran<sup>2</sup>, Claudio De Virgilio<sup>\*,4</sup> and Ralf  
5 Erik Wellinger<sup>\*,2,3</sup>

6 <sup>2</sup> *Centro Andaluz de Biolog  a Molecular y Medicina Regenerativa - CABIMER, Consejo Superior de*  
7 *Investigaciones Cient  ficas - Universidad de Sevilla - Universidad Pablo de Olavide, Avda. Am  rico*  
8 *Vespucio 24, 41092 Seville, Spain*

9 <sup>3</sup> *Departamento de Gen  tica, Facultad de Biolog  a, Universidad de Sevilla*

10 <sup>4</sup> *University of Fribourg, Department of Biology, Chemin du Mus  e 10, 1700 Fribourg, Switzerland*

11

12 \* Ralf Erik Wellinger, CABIMER-Universidad de Sevilla, Avda. Am  rico Vespucio 24, 41092 Seville,  
13 Spain. Phone ++34 954 467 968.

14 \* Claudio De Virgilio, University of Fribourg, Department of Biology, Chemin du Mus  e 10, 1700 Fribourg,  
15 Switzerland. Phone ++41 26 300 8656.

16 **Email:** [wellinger@us.es](mailto:wellinger@us.es), [claudio.devirgilio@unifr.ch](mailto:claudio.devirgilio@unifr.ch)

17

18 **Author Contributions:** R.N., H.G., R.V.D., C.D.V., and R.E.W. designed research; R.N., H.G., L.Z., E.F.-  
19 G., M.T., N.G.-R., M.-P.P.-G., and R.E.W. performed research; R.N., H.G., N.G.-R., R.V.D., C.D.V., and  
20 R.E.W. analyzed the data; C.D.V., and R.E.W. wrote the paper.

21 **Competing Interest Statement:** The authors declare no conflict of interest.

22 **Classification:** Biological Sciences, Genetics.

23 **Keywords:** Autophagy; Manganese; Mitophagy; NRAMP-transporter; TORC1

24 **This PDF file includes:**

25 Main Text  
26 Figures 1 to 5  
27 Supplementary Figures and Tables  
28

---

<sup>1</sup> Both authors contributed equally

## 1 **Abstract**

2 The essential biometal manganese (Mn) serves as a cofactor for several enzymes that are crucial for the  
3 prevention of human diseases. Whether intracellular Mn levels may be sensed and modulate intracellular  
4 signaling events has so far remained largely unexplored. The highly conserved target of rapamycin complex  
5 1 (TORC1, mTORC1 in mammals) protein kinase requires divalent metal cofactors such as magnesium  
6 ( $Mg^{2+}$ ) to phosphorylate effectors as part of a homeostatic process that coordinates cell growth and  
7 metabolism with nutrient and/or growth factor availability. Here, our genetic approaches reveal that TORC1  
8 activity is stimulated *in vivo* by elevated cytoplasmic Mn levels, which can be induced by loss of the Golgi-  
9 resident  $Mn^{2+}$  transporter Pmr1 and which depends on the natural resistance-associated macrophage  
10 protein (NRAMP) metal ion transporters Smf1 and Smf2. Accordingly, genetic interventions that increase  
11 cytoplasmic  $Mn^{2+}$  levels antagonize the effects of rapamycin in triggering autophagy, mitophagy, and Rtg1-  
12 Rtg3-dependent mitochondrion-to-nucleus retrograde signaling. Surprisingly, our *in vitro* protein kinase  
13 assays uncovered that  $Mn^{2+}$  activates TORC1 substantially better than  $Mg^{2+}$ , which is primarily due to its  
14 ability to lower the  $K_m$  for ATP, thereby allowing more efficient ATP coordination in the catalytic cleft of  
15 TORC1. These findings, therefore, provide both a mechanism to explain our genetic observations in yeast  
16 and a rationale for how fluctuations in trace amounts of Mn can become physiologically relevant. Supporting  
17 this notion, TORC1 is also wired to feedback control mechanisms that impinge on Smf1 and Smf2. Finally,  
18 we also show that  $Mn^{2+}$ -mediated control of TORC1 is evolutionarily conserved in mammals, which may  
19 prove relevant for our understanding of the role of Mn in human diseases.

## 20 **Significance Statement**

21 The target of rapamycin complex 1 (TORC1, mTORC1 in mammals) is a central, highly conserved controller  
22 of cell growth and aging in eukaryotes. Our study shows that the essential biometal manganese (Mn) acts  
23 as a primordial activator of TORC1 and that NRAMP metal ion transporters control TORC1 activity by  
24 regulating cytoplasmic  $Mn^{2+}$  levels. Moreover, TORC1 activity regulates  $Mn^{2+}$  levels through feedback  
25 circuits impinging on NRAMP transporters. Altogether, our results indicate that Mn homeostasis is highly  
26 regulated and modulates key cellular processes such as autophagy, mitophagy, and Rtg1-3 complex-  
27 dependent retrograde response. These findings open new perspectives for the understanding of  
28 neurodegenerative disorders and aging-related processes

## 29 **Introduction**

30 Mn is a vital trace element that is required for the normal activity of the brain and nervous system by acting,  
31 among other mechanisms, as an essential, divalent metal cofactor for enzymes such as the mitochondrial  
32 enzyme superoxide dismutase 2 (1), the apical activator of the DNA damage response serine/threonine

1 kinase ATM (2) or the  $Mn^{2+}$ -activated glutamine synthetase (3). However,  $Mn^{2+}$  becomes toxic when  
2 enriched in the human body (4). While mitochondria have been proposed as a preferential organelle where  
3  $Mn^{2+}$  accumulates and unfolds its toxicity by increasing oxidative stress and thus mitochondrial dysfunction  
4 (5), the molecular mechanisms of  $Mn^{2+}$  toxicity in humans are also related to protein misfolding, endoplasmic  
5 reticulum (ER) stress, and apoptosis (6).  $Mn^{2+}$  homeostasis is coordinated by a complex interplay between  
6 various metal transporters for  $Mn^{2+}$  uptake and intracellular  $Mn^{2+}$  distribution and represents an essential  
7 task of eukaryotic cells, which is also of vital importance specifically for neuronal cell health (7).

8 Much of our knowledge on  $Mn^{2+}$  transport across the plasma membrane into the ER, the Golgi,  
9 endosomes, and vacuoles comes from studies in *Saccharomyces cerevisiae* (outlined in [Figure 1A](#)).  
10 Typically,  $Mn^{2+}$  is shuttled across membranes by transporters that belong to the NRAMP family, which are  
11 highly conserved metal transporters responsible for iron (Fe) and  $Mn^{2+}$  uptake (8). Not surprisingly,  
12 therefore, NRAMP orthologs have been found to cross-complement functions in yeast, mice, and humans  
13 (9). One of the best-studied NRAMPs is the yeast plasma membrane protein Smf1. Interestingly,  
14 extracellular Fe or  $Mn^{2+}$  supplementation triggers Bsd2 adaptor protein-dependent, Rsp5-mediated  
15 ubiquitination of Smf1, which initiates its sorting through the endocytic multivesicular body pathway and  
16 subsequent lysosomal degradation (10, 11). The Smf1 paralogs Smf2 and Smf3 are less well studied, but  
17 Smf2 is predominantly localized at endosomes and its levels decrease under conditions of Mn or Fe  
18 overload (12, 13). Within cells, the P-type ATPase Pmr1 (also known as Bsd1) represents a key transporter  
19 that shuttles  $Ca^{2+}$  and  $Mn^{2+}$  ions into the Golgi lumen. Its loss leads to increased levels of  $Mn^{2+}$  in the  
20 cytoplasm due to defective detoxification (14). Noteworthy, several phenotypes associated with loss of Pmr1  
21 have been shown to arise as a consequence of  $Mn^{2+}$  accumulation in the cytoplasm, including telomere  
22 shortening, genome instability and bypass of the superoxide dismutase Sod1 requirement (14–17).

23 TORC1/mTORC1 is a central, highly conserved controller of cell growth and aging in eukaryotes. It  
24 coordinates the cellular response to multiple inputs, including nutritional availability, bioenergetic status,  
25 oxygen levels, and, in multicellular organisms, the presence of growth factors (18, 19). In response to these  
26 diverse cues, TORC1 regulates cell growth and proliferation, metabolism, protein synthesis, autophagy, and  
27 DNA damage responses (20, 21). In *S. cerevisiae*, which played a pivotal role in the discovery and dissection  
28 of the TOR signaling network (22), TORC1 is mainly localized on the surfaces of vacuoles and endosomes  
29 (23, 24) where it integrates, among other cues, amino acid signals through the Rag GTPases and Pib2 (25,  
30 26). In mammals, amino acids also activate the Rag GTPases, which then recruit mTORC1 to the lysosomal  
31 surface where it can be allosterically activated by the small GTPase RHEB (Ras homolog expressed in  
32 brain) that mediates the presence of growth factors and sufficient energy levels (20, 27–29). Interestingly,  
33 mTORC1 regulates cellular Fe homeostasis (30), but how it may be able to sense Fe levels remains largely  
34 unknown. In addition, although TORC1/mTORC1 requires divalent metal ions to coordinate ATP at its

1 catalytic cleft (31, 32), it is currently not known whether these or any other trace elements may play a  
2 physiological or regulatory role in controlling its activity.

3 In yeast, genetic evidence links high levels of cytoplasmic  $Mn^{2+}$  levels to TORC1 function, as loss of Pmr1  
4 confers rapamycin resistance (33). However, the underlying molecular mechanism(s) by which  $Mn^{2+}$  may  
5 mediate rapamycin resistance remains to be explored. Here, we show that  $Mn^{2+}$  uptake by NRAMP  
6 transporters modulates rapamycin resistance and that, in turn, TORC1 inhibition by rapamycin regulates  
7 NRAMP transporter availability. Moreover, intracellular  $Mn^{2+}$  excess antagonizes rapamycin-induced  
8 autophagy, mitophagy, and Rtg1-3 transcription factor complex-dependent retrograde response activation.  
9 Surprisingly, our *in vitro* and *in vivo* analyses reveal that TORC1 protein kinase activity is strongly activated  
10 in the presence of  $MnCl_2$ . In our attempts to understand the mechanisms underlying these observations, we  
11 discovered that  $Mn^{2+}$ , when compared to  $Mg^{2+}$ , significantly boosts the affinity of TORC1 for ATP. Combined,  
12 our findings also indicate that TORC1 activity is regulated by and regulates intracellular  $Mn^{2+}$  levels, defining  
13  $Mn^{2+}$  homeostasis as a key factor in cell growth control. Importantly, our studies in human cells indicate  
14 that  $Mn^{2+}$ -driven TORC1 activation is likely conserved throughout evolution, opening new perspectives for  
15 our understanding of  $Mn^{2+}$  toxicities and their role in neurodegenerative disorders and aging.

## 16 **Results**

17  
18 ***NRAMP transporters regulate cytoplasmic  $Mn^{2+}$  levels and rapamycin resistance***  
19 Yeast cells lacking the Golgi-localized P-type ATPase Pmr1, which transports  $Ca^{2+}$  and  $Mn^{2+}$  ions from the  
20 cytoplasm to the Golgi lumen, are resistant to the TORC1 inhibitor rapamycin (33, 34), a phenotype that is  
21 generally associated with increased TORC1 activity. In *pmr1* $\Delta$  mutants, defective  $Mn^{2+}$  shuttling at the Golgi  
22 leads to protein sorting defects and accumulation of the general amino-acid permease Gap1 at the plasma  
23 membrane (35). In theory, this may translate into unrestrained uptake and intracellular accumulation of  
24 amino acids, and thus hyperactivation of TORC1. However, arguing against such a model, we found cells  
25 lacking both Pmr1 and Gap1 to remain resistant to low doses of rapamycin (Figure S1A). We then asked  
26 whether loss of Pmr1 may affect the expression levels or cellular localization of TORC1. Our results  
27 indicated that GFP-Tor1 protein levels and localization to vacuolar and endosomal membranes remained  
28 unaltered in exponentially growing and rapamycin-treated WT and *pmr1* $\Delta$  cells (Figure S1B and S1C). Given  
29 the roughly 5-fold increased intracellular  $Mn^{2+}$  levels of cells lacking Pmr1 (14), we then considered the  
30 possibility that  $Mn^{2+}$  may have a more direct role in TORC1 activation. We, therefore, assessed the  
31 rapamycin sensitivity of cells lacking the adaptor protein Bsd2, which mediates Rsp5-dependent  
32 degradation in response to high  $Mn^{2+}$  levels of both the plasma membrane- and endosomal membrane-  
33 resident NRAMP  $Mn^{2+}$  transporters Smf1 and Smf2, respectively (Figure 1A; (12)). Interestingly, *bsd2* $\Delta$  cells  
34 were as sensitive to rapamycin as WT cells, but, unlike WT cells, could be rendered rapamycin resistant by

1 the addition of 1 mM MnCl<sub>2</sub> in the growth medium (Figure 1B and Figure S2). This effect was strongly  
2 reduced in the absence of Smf2 (Figure 1C), suggesting that Smf2-dependent endosomal Mn<sup>2+</sup> export and,  
3 consequently, cytoplasmic accumulation of Mn<sup>2+</sup> may be required for rapamycin resistance under these  
4 conditions. In line with such a model, we found that overexpression of the vacuolar membrane-resident  
5 Vcx1-M1 transporter, which imports Mn<sup>2+</sup> into the vacuolar lumen, suppressed the Mn-induced rapamycin  
6 resistance of *bsd2Δ* mutants and increased their sensitivity to rapamycin in the absence of extracellular  
7 MnCl<sub>2</sub> supply (Figure S2).

8 As schematically outlined in Figure 1A, several metal transporters have been associated with Mn<sup>2+</sup>  
9 transport in yeast, including those localized at the plasma membrane (Smf1 and Pho84), the endosomes  
10 (Smf2 and Atx2), the Golgi (Pmr1 and Gdt1), the vacuole (Ccc1 and Vcx1), the ER (Spf1), and possibly the  
11 mitochondria (Mtm1). To identify which of these transporters contributes to the rapamycin resistance of  
12 *pmr1Δ* cells, we next monitored the growth of double mutants lacking Pmr1 and any of the corresponding  
13 metal transporters in the presence of rapamycin (Figure 1D). Interestingly, only loss of Smf1 or Smf2  
14 reestablished rapamycin sensitivity in *pmr1Δ* cells, while loss of Gdt1 or Ccc1 even slightly enhanced the  
15 rapamycin-resistance phenotype of *pmr1Δ* cells. Of note, growth was monitored on CaCl<sub>2</sub>-supplemented  
16 media that improved the growth of *pmr1Δ* cells lacking Smf1 or Smf2 without affecting their sensitivity to  
17 rapamycin, which also rules out the possibility that Ca<sup>2+</sup> is associated with the observed rapamycin  
18 resistance phenotype (Figure 1D and Figure S3). Taken together, our data indicate that increased  
19 intracellular Mn<sup>2+</sup> levels in *pmr1Δ* cells lead to rapamycin resistance and that this phenotype can be  
20 suppressed either by reducing Mn<sup>2+</sup> import through loss of Smf1 or, possibly, by increasing Mn<sup>2+</sup>  
21 sequestration in endosomes through loss of Smf2 as previously suggested (36). To confirm our prediction  
22 that loss of Smf2 reduces cytoplasmic Mn<sup>2+</sup> levels, we measured MnCl<sub>2</sub>-dependent telomere length  
23 shortening as an indirect proxy for cytoplasmic and nuclear Mn levels (37). Accordingly, telomere length  
24 was significantly decreased in *pmr1Δ* cells (when compared to WT cells), increased in *smf2Δ* cells, and  
25 similar between *pmr1Δ smf2Δ* and WT cells (Figure 1E). These data, therefore, corroborate our assumption  
26 that loss of Smf2 suppresses the high cytoplasmic and nuclear Mn<sup>2+</sup> levels of *pmr1Δ* cells.

27 The function of metal transporters is highly conserved across evolution as exemplified by the fact that the  
28 expression of the human Pmr1 ortholog, the secretory pathway Ca<sup>2+</sup>/Mn<sup>2+</sup> ATPase ATP2C1/SPCA1  
29 (ATPase secretory pathway Ca<sup>2+</sup> transporting 1), can substitute for Pmr1 function in yeast (38). A similar  
30 degree of functional conservation from lower to higher eukaryotes exists for NRAMP transporters (9).  
31 Because Smf2 is of specific interest in the context of the present study, we asked whether the orthologous  
32 mouse proteins, *i.e.* the divalent metal transporter SLC11A1 (NRAMP1) and SLC11A2 (DMT1) isoforms  
33 (solute carrier family 11 member 1 and 2, respectively), can restore rapamycin resistance in *pmr1Δ smf2Δ*  
34 double mutants. This was indeed the case, as the SLC11A2 isoform complemented Smf2 function in these

- 1 assays (Figure 1F), indicating that Pmr1 and Smf2 are evolutionarily conserved transporters that are
- 2 required for  $Mn^{2+}$  homeostasis.

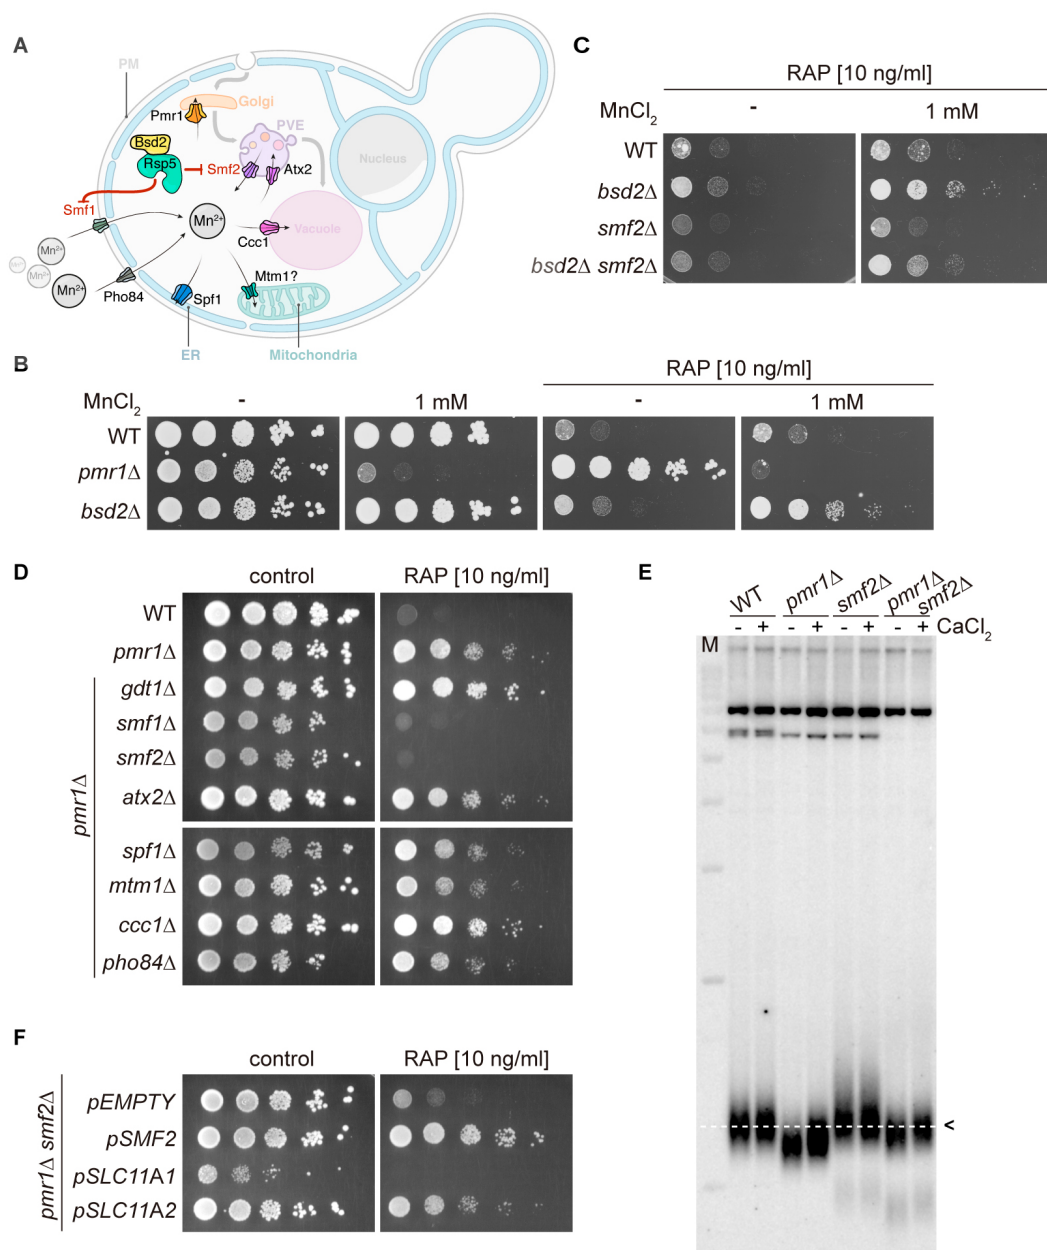

- 3
- 4 **Figure 1. NRAMP transporters link Mn-import to rapamycin resistance.** (A) Schematic outline of yeast  $Mn^{2+}$ -
- 5 transporters and their intracellular localization. PM, plasma membrane; PVE, pre-vacuolar endosomes; ER,
- 6 endoplasmic reticulum. Note that Bsd2 is a specific adaptor protein for Rsp5-mediated Smf1 and Smf2 ubiquitination in
- 7 response to  $Mn^{2+}$  overload. The Golgi  $Mn^{2+}$ -transporter Gdt1 is omitted for clarity. (B-D) Growth on  $MnCl_2$ - and/or
- 8 rapamycin-containing medium (RAP). 10-fold dilutions of exponentially growing cells are shown. Strains and compound
- 9 concentrations are indicated. Note that the medium used in (D) was supplemented with 10 mM  $CaCl_2$ . Data obtained
- 10 in a medium without  $CaCl_2$  are shown in Figure S3. (E) Southern blot analysis of telomere length. Genomic DNA was
- 11 derived from cells grown in a medium supplemented or not with  $CaCl_2$  and cleaved by *Xho*I before agarose gel

1 electrophoresis. The 1.3 kb average length of telomeres from WT cells (dashed white line, black arrow) and size marker  
2 (M) are shown. (F) Growth of *pmr1Δ smf2Δ* double mutants transformed with plasmids expressing yeast Smf2, *Mus*  
3 *musculus* SLC11A1, or SLC11A2 on rapamycin-containing medium.

4  
5 ***Elevated levels of intracellular Mn<sup>2+</sup> antagonize rapamycin-induced autophagy, mitophagy, and***  
6 ***Rtg1-3 retrograde signaling***

7 Growth inhibition by rapamycin mimics starvation conditions and leads to the degradation and recycling of  
8 a wide spectrum of biological macromolecules via autophagy. In this context, the *pmr1Δ* mutant has  
9 previously been found to be defective in nutrient depletion-induced mitophagy (39). We thus wondered if  
10 rapamycin-induced autophagic processing may also be defective in *pmr1Δ* mutants. We took advantage of  
11 a GFP-Atg8 fusion construct (40) to monitor autophagy through GFP-Atg8 synthesis and processing in cells  
12 that had been subjected to rapamycin treatment for up to 6 hours. Rapamycin-induced GFP-Atg8 expression  
13 was strongly reduced in *pmr1Δ* cells and this phenotype was mitigated in the *pmr1Δ smf2Δ* double mutant  
14 (Figure 2A and B), suggesting that the initiation of autophagy is compromised by elevated cytoplasmic Mn<sup>2+</sup>  
15 levels. Next, we assessed mitophagy by following the expression and degradation of the GFP-tagged  
16 mitochondrial membrane protein Om45 (41). Rapamycin treatment led to a time-dependent up-regulation  
17 Om45-GFP protein levels in all tested strains (Figure 2C and D). However, the accumulation of the cleaved  
18 GFP protein was strongly reduced in the *pmr1Δ* single mutant, while this effect was again suppressed in the  
19 *pmr1Δ smf2Δ* double mutant. Combined, our results therefore suggest that the intracellular Mn<sup>2+</sup> flux  
20 modulates both rapamycin-induced autophagy and mitophagy.

21 To identify additional responses to elevated cytosolic Mn<sup>2+</sup> levels, we took advantage of our  
22 previously published transcriptome analysis of *pmr1Δ* cells (37). Careful analysis of these datasets revealed  
23 that the expression levels of genes activated by the heterodimeric Rtg1-Rtg3 transcription factor are reduced  
24 in *pmr1Δ* cells (see Table S1). Since TORC1 inhibits cytoplasmic-to-nuclear translocation of Rtg1-Rtg3 (42),  
25 we monitored the localization and protein levels of Rtg3-GFP in exponentially growing and rapamycin-  
26 treated WT and *pmr1Δ* cells. Rapamycin treatment not only induced nuclear enrichment of Rtg3-GFP as  
27 reported (Figure 2E; (42)) but also significantly increased the levels of Rtg3-GFP (Figure 2F). Loss of Pmr1,  
28 in contrast, significantly reduced the Rtg3-GFP levels in exponentially growing and rapamycin-treated cells,  
29 which also translated into barely visible levels of Rtg3-GFP in the nucleus (Figure 2E and 2F). Importantly,  
30 and in line with our finding that loss of Smf2 suppresses the high cytoplasmic and nuclear Mn<sup>2+</sup> levels of  
31 *pmr1Δ* cells (see above), these latter defects in *pmr1Δ* cells were largely suppressed by loss of Smf2. Thus,  
32 our findings posit a model in which elevated cytoplasmic Mn<sup>2+</sup> levels antagonize autophagy, mitophagy, and  
33 Rtg1-3-dependent retrograde signaling presumably through activation of TORC1.

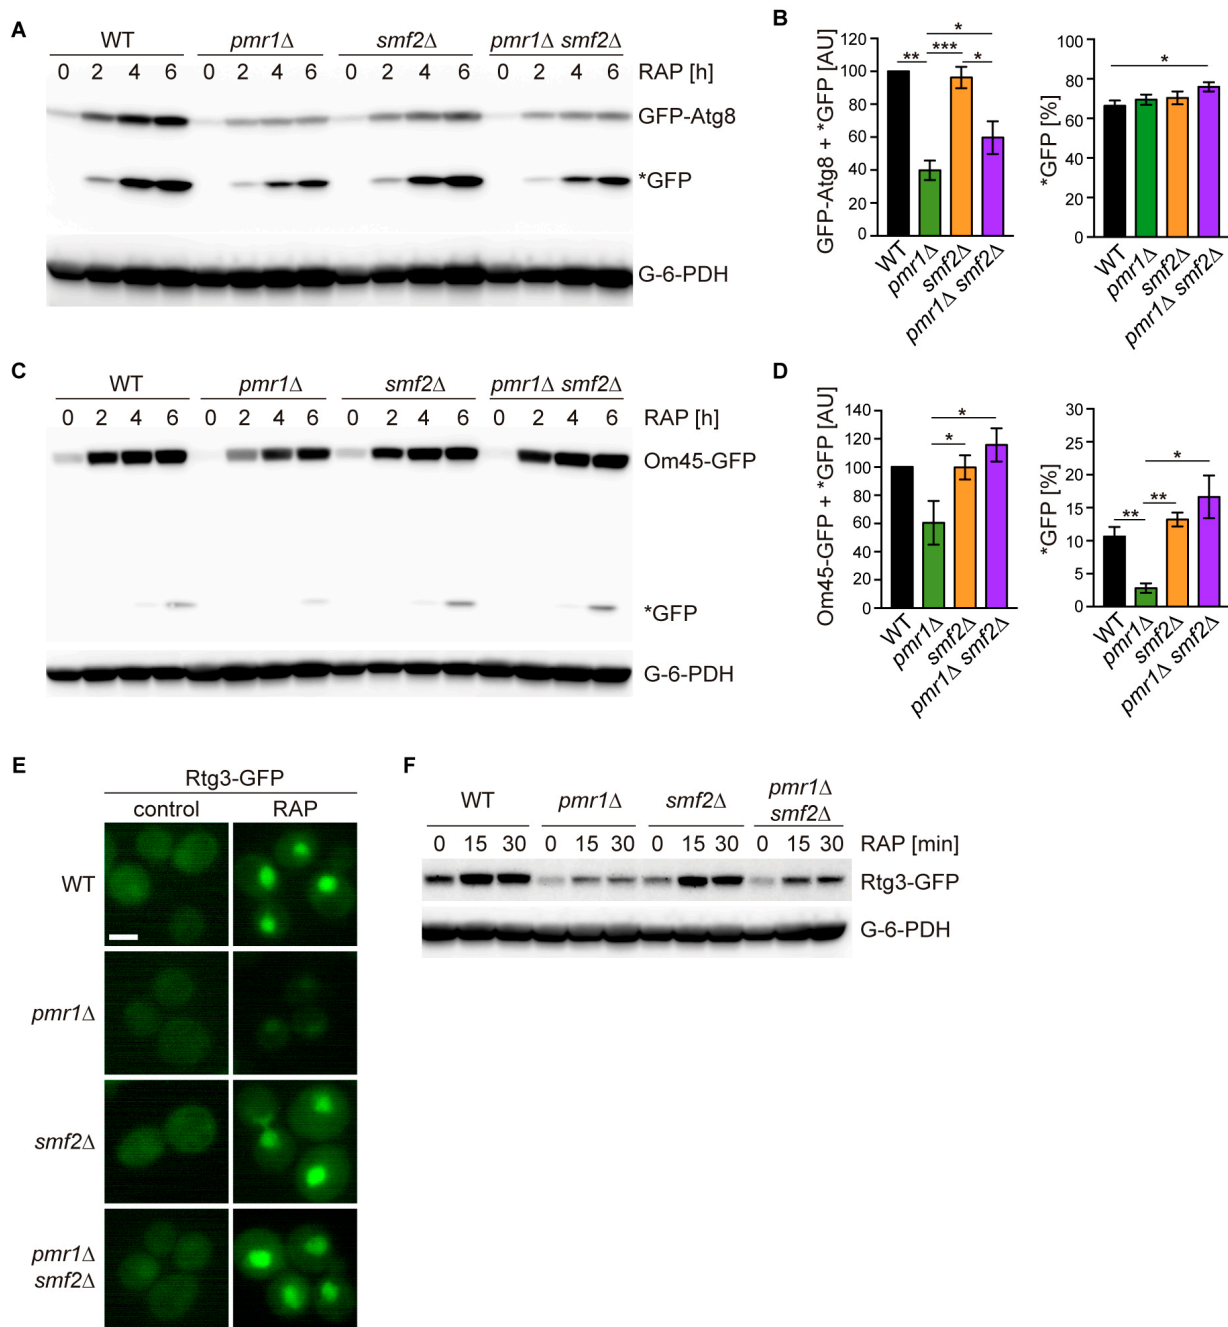

1  
2 **Figure 2. Intracellular Mn excess antagonizes rapamycin-induced autophagy, mitophagy, and Rtg1-3 retrograde**  
3 **signaling.** (A) Exponentially growing WT and indicated mutant strains expressing plasmid-encoded GFP-Atg8 were  
4 treated for up to 6 h with 200 ng/ml rapamycin (RAP). GFP-Atg8 and cleaved GFP (\*GFP) protein levels were analyzed  
5 by immunoblotting. Glucose-6-phosphate dehydrogenase (G-6-PDH) levels were used as a loading control. (B)  
6 Quantification of GFP-Atg8 and \*GFP levels after a 6 h rapamycin treatment. Total GFP signal (Atg8-GFP + \*GFP)  
7 normalized to WT levels (left) and percentage of \*GFP relative to the total GFP signal (right) are plotted. Data represent  
8 means ± SEM of independent experiments (n=4). Statistical analysis: two-tailed t-test (paired for normalized data,  
9 unpaired for GFP\* percentage). \* p<0.05; \*\* p<0.01; \*\*\* p<0.001. (C) Exponentially growing WT and indicated mutant  
10 strains expressing Om45-GFP from the endogenous locus were treated and processed as in (A). (D) Quantification of



1 Om45-GFP and \*GFP levels after a 6 h rapamycin treatment. Details as in (B) with n=3. (E) Representative fluorescence  
2 microscope images of WT, *pmr1* $\Delta$ , *smf2* $\Delta$ , and *pmr1* $\Delta$  *smf2* $\Delta$  mutants expressing an episomic Rtg3-GFP reporter  
3 construct. Exponentially growing cells were treated or not (control) for 30 min with 200 ng/ml rapamycin (RAP). Scale  
4 bar represents 5  $\mu$ m. (F) Rtg3-GFP expressing cells were treated for up to 30 min with 200 ng/ml rapamycin. protein  
5 levels were analyzed by immunoblotting. G-6-PDH levels were used as a loading control.

6

## 7 ***MnCl<sub>2</sub> stimulates TORC1 kinase activity in vivo and in vitro***

8 The yeast Tor1 kinase is a member of the phosphatidylinositol 3-kinase (PI3K) -related kinase (PIKK) family  
9 that can phosphorylate the human eukaryotic translation initiation factor 4E binding protein (eIF4-BP/PHAS-  
10 I) *in vitro* (43). Curiously, it does so much more efficiently when the respective *in vitro* kinase assays contain  
11 Mn<sup>2+</sup> rather than Mg<sup>2+</sup> as the sole divalent cation, a property that it appears to share with PI3-kinases (44–  
12 46). A similar preference for Mn<sup>2+</sup> over Mg<sup>2+</sup> has also been observed in mTOR kinase autophosphorylation  
13 assays (31, 32). Based on these and our observations, we decided to assess whether Mn<sup>2+</sup> may act as a  
14 metal cofactor for TORC1 activity *in vitro* using TORC1 purified from yeast and a truncated form of Lst4  
15 (Lst4<sup>L<sub>oop</sub></sup>; (47)) as a substrate. In control experiments without divalent ions, TORC1 activity remained  
16 undetectable (Figure 3A and B). The addition of MnCl<sub>2</sub>, however, not only stimulated TORC1 *in vitro* in a  
17 concentration-dependent manner but also activated TORC1 dramatically more efficiently than MgCl<sub>2</sub> (with  
18 25-fold lower levels of MnCl<sub>2</sub> [38  $\mu$ M] than MgCl<sub>2</sub> [980  $\mu$ M] promoting half-maximal activation of TORC1;  
19 Figure 3A and B). We next considered the possibility that Mn<sup>2+</sup> is superior to Mg<sup>2+</sup> in favoring the  
20 coordination of ATP in the catalytic cleft of TORC1. Supporting this idea, we found that Mn<sup>2+</sup> significantly  
21 reduced the K<sub>m</sub> for ATP (5.3-fold) of TORC1 (Figure 3C and 3D). Moreover, even in the presence of  
22 saturating Mg<sup>2+</sup> levels (*i.e.* 4 mM), the addition of 160  $\mu$ M Mn<sup>2+</sup> was able to enhance the V<sub>max</sub> almost 2-fold  
23 and decrease the K<sub>m</sub> for ATP of TORC1 from 50.7 to 34.4  $\mu$ M, which indicates that Mn<sup>2+</sup> can efficiently  
24 compete with Mg<sup>2+</sup> and thereby activate TORC1. Notably, the conditions used in our *in vitro* kinase assays  
25 are quite comparable to the *in vivo* situation: accordingly, intracellular Mg<sup>2+</sup> levels in yeast are approximately  
26 around 2 mM (48), while the Mn<sup>2+</sup> levels range from 26  $\mu$ M in WT cells to 170  $\mu$ M in *pmr1* $\Delta$  cells (49). Our  
27 *in vitro* assays, therefore, provide a simple rationale for why *pmr1* $\Delta$  cells are resistant to rapamycin: elevated  
28 Mn<sup>2+</sup> levels in *pmr1* $\Delta$  favorably boost the kinetic parameters of TORC1.

## 29 ***TORC1 regulates NRAMP transporter protein levels***

30 To maintain appropriate intracellular Mn<sup>2+</sup> concentrations, cells adjust Smf1 and Smf2 protein levels through  
31 Bsd2-dependent and -independent, post-translational modifications that ultimately trigger their vacuolar  
32 degradation through the endocytic multivesicular body pathway (12, 50). Because NRAMP transporters are  
33 important for Mn-dependent TORC1 activation, and because TORC1 is often embedded in regulatory  
34 feedback loops to ensure cellular homeostasis (51), we next asked whether rapamycin-mediated TORC1

1 inactivation may affect the levels and/or localization of Smf1 and Smf2 using strains that express GFP-Smf1  
 2 or Smf2-GFP. Rapamycin treatment triggered a strong increase in GFP-Smf1 levels (Figure 4A and 4B),  
 3 which is likely due to transcriptional activation of Smf1 under these conditions as published earlier (52). In  
 4 line with this interpretation, we found the respective increase to be abolished when rapamycin-treated cells  
 5 were co-treated with the protein synthesis inhibitor cycloheximide (CHX). In addition, because GFP-Smf1  
 6 appeared to be degraded at a similar rate in CHX-treated cells that were treated, or not, with rapamycin,  
 7 our data further indicate that TORC1 does not control Smf1 levels through posttranslational control of Smf1  
 8 turnover. Interestingly, GFP-Smf1 remained predominantly at the plasma membrane in rapamycin-treated  
 9 cells, even though these cells also accumulated more cleaved GFP in the vacuoles (Figure 4C). We infer  
 10 from these data that TORC1 inhibition activates Smf1 expression, likely as part of a feedback control loop  
 11 through which TORC1 couples its activity to  $Mn^{2+}$  uptake.

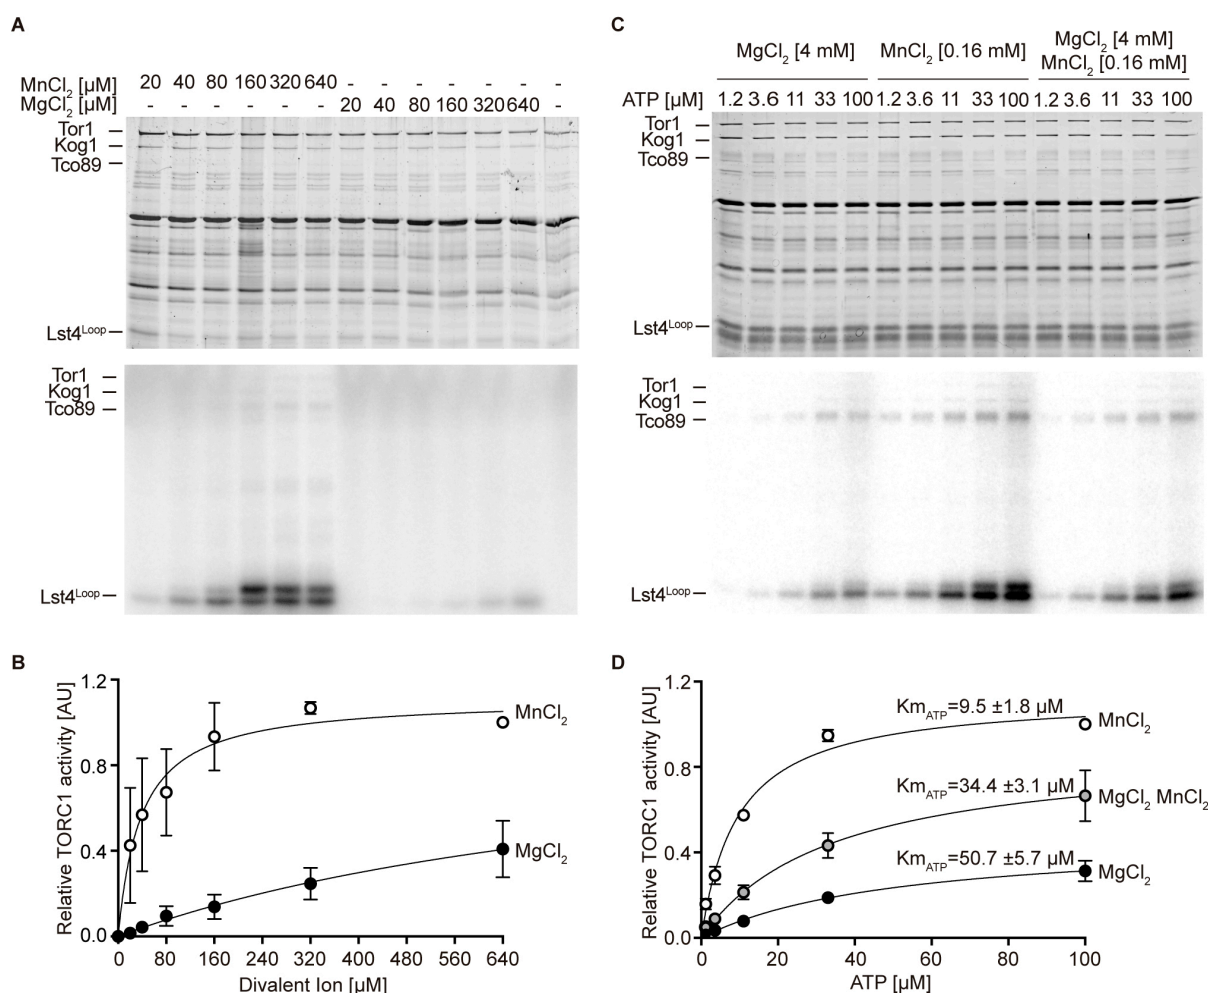

12  
 13 **Figure 3. MnCl<sub>2</sub> stimulates TORC1 kinase activity *in vitro* and *in vivo*.** (A) *In vitro* TORC1 kinase assays using [ $\gamma$ -<sup>32</sup>P]-ATP, recombinant Lst4<sup>Loop</sup> as substrate, and increasing concentrations (2-fold dilutions) of MgCl<sub>2</sub> or MnCl<sub>2</sub>. Substrate phosphorylation was detected by autoradiography (lower blot) and Sypro Ruby staining is shown as loading control (upper blot). (B) Quantification of the assay shown in (A). Curve fitting and parameter calculations were

1 performed with GraphPad Prism. Data shown are means ( $\pm$  SEM,  $n = 3$ ). (C) *In vitro* kinase assays (as in A) using the  
 2 indicated concentrations of  $MgCl_2$  and/or  $MnCl_2$  and increasing concentrations of ATP. Substrate phosphorylation was  
 3 detected by autoradiography (lower blot) and Sypro Ruby staining is shown as loading control (upper blot). (D)  
 4 Quantification of the assay shown in (C). Curve fitting and parameter calculations were performed with GraphPad Prism.  
 5 Data shown are means ( $\pm$  SEM,  $n = 3$ ).

6 Rapamycin-treated cells that were either co-treated or not with CHX exhibited Smf2-GFP levels that  
 7 steadily decreased at a similar rate, with cleaved GFP accumulating in parallel (Figure 4D and 4E). Since  
 8 this rate appeared to be higher than the one observed in cells treated with CHX alone, our data suggest  
 9 that TORC1 antagonizes the turnover of Smf2. This was further corroborated by our fluorescence  
 10 microscopy analyses revealing that the GFP signal in Smf2-GFP-expressing cells shifted from late  
 11 Golgi/endosomal foci (see (37)) to a predominant signal within the vacuolar lumen when cells were treated  
 12 with rapamycin (Figure 4F). Whether this event is an indirect consequence of higher  $Mn^{2+}$  uptake under  
 13 these conditions (see above), or potentially part of a local feedback control mechanism of endosomal  
 14 TORC1 (53), remains to be addressed in future studies.

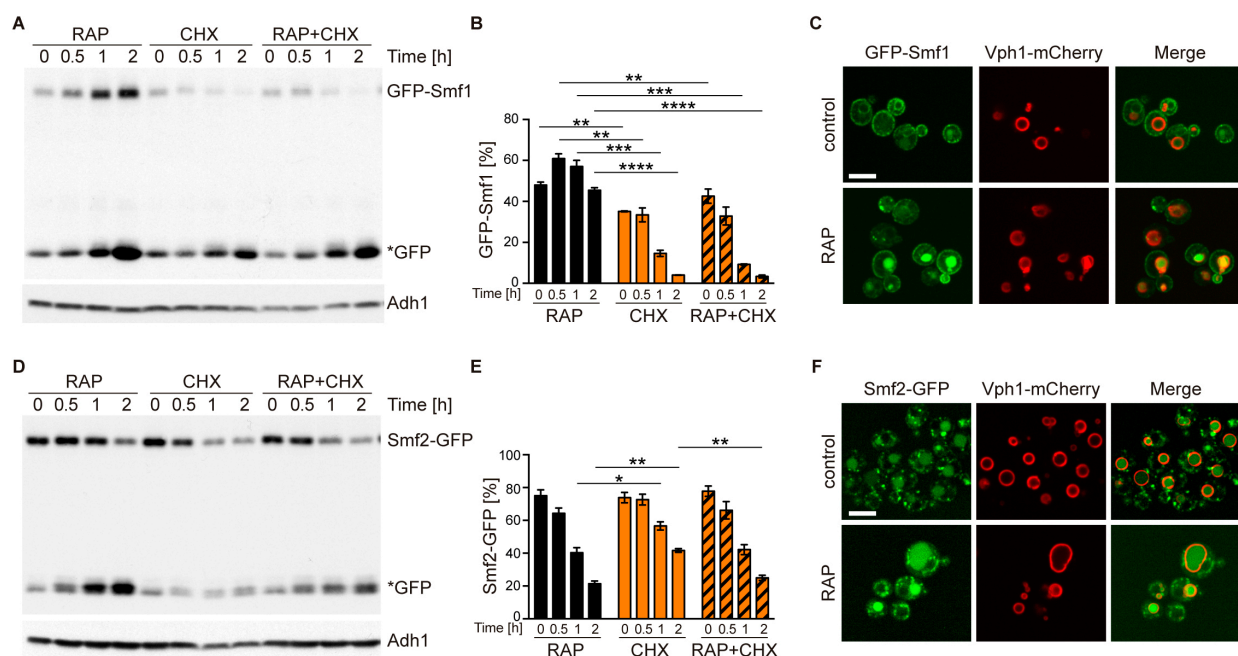

15  
 16 **Figure 4. TORC1 regulates NRAMP transporter levels** (A) GFP-Smf1 expressing cells were cultivated for 5-6 h in a  
 17 synthetic medium devoid of manganese sulfate before being treated with 200 ng/ml rapamycin (RAP), 25  $\mu$ g/ml  
 18 cycloheximide (CHX) or both compounds (RAP+CHX) for the indicated times. GFP-Smf1 and cleaved GFP (\*GFP)  
 19 protein levels were analyzed by immunoblotting using an anti-GFP antibody. Alcohol dehydrogenase (Adh1) protein  
 20 levels, probed with anti-Adh1 antibodies, served as a loading control. (B) Quantification of GFP-Smf1. Percentages of  
 21 GFP-Smf1 relative to the total GFP signal (GFP-Smf1 + GFP). Data represent means  $\pm$  SEM of independent  
 22 experiments ( $n=3$ ). Statistical analysis: unpaired two-tailed t-test. \*  $p<0.05$ ; \*\*  $p<0.01$ , \*\*\*  $p<0.001$ , \*\*\*\*  $p<0.0001$ . (C)  
 23 Microscopic analysis of GFP-Smf1 localization. Cells co-expressing GFP-Smf1 and the vacuolar marker Vph1-mCherry  
 24 were grown exponentially in a manganese-free medium for 5-6 h, then treated with 200 ng/ml rapamycin for 2 h. Scale  
 25 bar represents 5  $\mu$ m. (D-E) Cells expressing Smf2-GFP from its endogenous locus were grown, treated, and processed

1 as in (A). (F) Microscopic analysis of Smf2-GFP localization. Cells co-expressing Smf2-GFP and the vacuolar marker  
2 Vph1-mCherry were cultivated, treated, and examined as in (C).

3

#### 4 ***Mn<sup>2+</sup> activates mTORC1 signaling in human cells***

5 To assess whether the response of TORC1 to Mn<sup>2+</sup> is conserved among eukaryotes, we investigated if  
6 externally supplied MnCl<sub>2</sub> activates mTORC1 signaling in mammalian cells. For this purpose, we used the  
7 human cell lines U2OS and HEK293T, which are widely used for the cellular dissection of mTORC1-  
8 mediated mechanisms in response to nutritional inputs (54). First, we examined the sufficiency of Mn<sup>2+</sup> to  
9 maintain the activity of the mTORC1 pathway by incubating U2OS cells in an amino acid starvation medium  
10 supplemented with increasing amounts of MnCl<sub>2</sub> (0-1 mM) for 2h. mTORC1 activity was assessed by  
11 monitoring phosphorylation of the mTORC1-downstream targets RPS6KB (ribosomal protein S6 kinase B;  
12 phospho-Threonine<sup>389</sup>) and RPS6 (ribosomal protein S6; phospho-Serine<sup>235-236</sup>). As shown in [Figure 5A](#),  
13 and as expected, both RPS6KB and RPS6 were fully phosphorylated at those specific residues in cells  
14 incubated in the presence of amino acids and completely de-phosphorylated in cells incubated in the  
15 absence of amino acids, without MnCl<sub>2</sub>. In agreement with a positive action of Mn<sup>2+</sup> towards mTORC1 in  
16 human cells, we observed a robust and dose-dependent increase in both RPS6KB and RPS6  
17 phosphorylation in amino acid-starved cells incubated in the presence of MnCl<sub>2</sub> at concentrations higher  
18 than 0.05 mM, with maximum phosphorylation observed at 0.5 mM of MnCl<sub>2</sub>. Confirming this result, we  
19 observed a similar response of RPS6KB and RPS6 phosphorylation to MnCl<sub>2</sub> treatment in HEK293T cells,  
20 except that the maximum response was reached at 1 mM ([Figure 5B](#)). These results indicate that Mn<sup>2+</sup> is  
21 sufficient to maintain the activity of the mTORC1 pathway in the absence of amino acid inputs, at least  
22 during short periods (2 h). To corroborate this conclusion, we also tested the phosphorylation of additional  
23 downstream targets of mTORC1 in response to a fixed concentration of MnCl<sub>2</sub> (0.35 mM) in U2OS cells.  
24 Amino acid-starvation of U2OS cells with MnCl<sub>2</sub> was sufficient to maintain the phosphorylation of the  
25 downstream targets of mTORC1 RPS6KB, RPS6, EIF4EBP1, and ULK1 (unc-51 like autophagy activating  
26 kinase 1) ([Figure 5C](#)). In line with our finding that MnCl<sub>2</sub> retained AKT1 (AKT serine/threonine kinase 1)  
27 phosphorylation in amino-acid starved cells, Mn<sup>2+</sup> has been reported to activate the mTORC1 upstream  
28 kinase AKT1, which is also a known mTORC2 downstream target (55, 56). However, AKT1 phosphorylation  
29 appeared to be much less pronounced than the phosphorylation of the mTORC1 downstream targets,  
30 validating the specificity of Mn towards mTORC1. Whether Mn<sup>2+</sup> may stimulate TORC2 activity remains to  
31 be explored.

32 Finally, to assess the physiological relevance of mTORC1 activation in response to Mn<sup>2+</sup>, we  
33 analyzed the effect of MnCl<sub>2</sub> treatment in autophagy, a cellular process inhibited by TORC1 both in yeast  
34 and mammalian cells (57, 58). To this end, we analyzed the autophagic marker MAP1LC3B/III (microtubule-

1 associated protein 1 light chain 3) (59). During autophagy initiation, MAP1LC3I is lipidated, thereby  
2 increasing the levels of MAP1LC3II. As previously reported, the withdrawal of amino acids led to a rapid  
3 increase in MAP1LC3II levels, indicating an increase in autophagy initiation (Figure 5D). Of note, the  
4 addition of MnCl<sub>2</sub> completely abolished the increase in MAP1LC3II levels, thus confirming that Mn<sup>2+</sup>  
5 prevented the initiation of autophagy downstream of mTORC1. These results were also observed in cells  
6 incubated in the presence of chloroquine, an inhibitor of the fusion of autophagosomes with the lysosome,  
7 thus confirming that Mn<sup>2+</sup> influences autophagy initiation, the process controlled by mTORC1 (Figure 5E).  
8 In addition, we analyzed the aggregation of MAP1LC3 upon autophagosome formation in U2OS cells stably  
9 expressing a GFP-MAP1LC3 construct. GFP aggregation indicates autophagosome formation in these  
10 cells. Similar to what we observed with endogenous MAP1LC3, GFP aggregation was increased during  
11 amino acid withdrawal and this increase was completely abolished by MnCl<sub>2</sub> treatment (Figure 5F-G). This  
12 result further confirms that the Mn-dependent activation of mTORC1 in human cells is physiologically  
13 relevant for autophagy inhibition. Altogether, our results show that Mn<sup>2+</sup> is sufficient to activate mTORC1 in  
14 the absence of other inputs in human cells and to inhibit autophagy downstream of mTORC1. These findings  
15 indicate that Mn<sup>2+</sup>-mediated activation of TORC1 is evolutionarily conserved from yeast to humans.

16

17

18

19

20 **Figure 5. MnCl<sub>2</sub> maintains mTORC1 activity during starvation in human cells.** (A-B) Human U2OS (A) and  
21 HEK293T (B) cells were starved for all amino acids and supplemented with increasing concentrations of MnCl<sub>2</sub> as  
22 indicated for 2 hours. Phosphorylation of the mTORC1 downstream targets RPS6KB and RPS6 was assessed by  
23 immunoblot analysis. A control with cells incubated in the presence of all proteinogenic amino acids (+AA) was included  
24 as a positive control. (C) Human U2OS were starved for all amino acids (-AA) and supplemented with 0.35 mM of MnCl<sub>2</sub>  
25 for 2 h. Phosphorylation of RPS6KB, RPS6, EIF4EBP1, ULK1, and AKT1 was assessed by immunoblot analysis. A  
26 control with cells incubated in the presence of all proteinogenic amino acids (+AA) was included as a positive control.  
27 (D-E) Human U2OS cells were treated as in (C) for 4 h either in the absence (D) or the presence (E) of chloroquine  
28 (CQ). Autophagic marker MAP1LC3I/II was then analyzed by immunoblot. (F-G) GFP-MAP1LC3 expressing U2OS cells  
29 were incubated as in (D). GFP-MAP1LC3 aggregation was assessed by confocal microscopy (F) and quantified using  
30 ImageJ software (G). Scale bar indicates 10 μm. Values were normalized to -AA condition. Graphs represent mean ±  
31 S.D., with n=3 (\*, p<0.05, ANOVA followed by Tukey's test). (H) Model of Mn<sup>2+</sup>-driven TORC1 activation. The Smf1/2  
32 NRAMP transporter-dependent increase in cytoplasmatic Mn<sup>2+</sup> levels favors TORC1-Mn<sup>2+</sup> binding and ATP  
33 coordination, leading to TORC1 hyperactivation. NRAMP transporters are part of a feedback control mechanism  
34 impinged by TPRC1 (dashed lines).

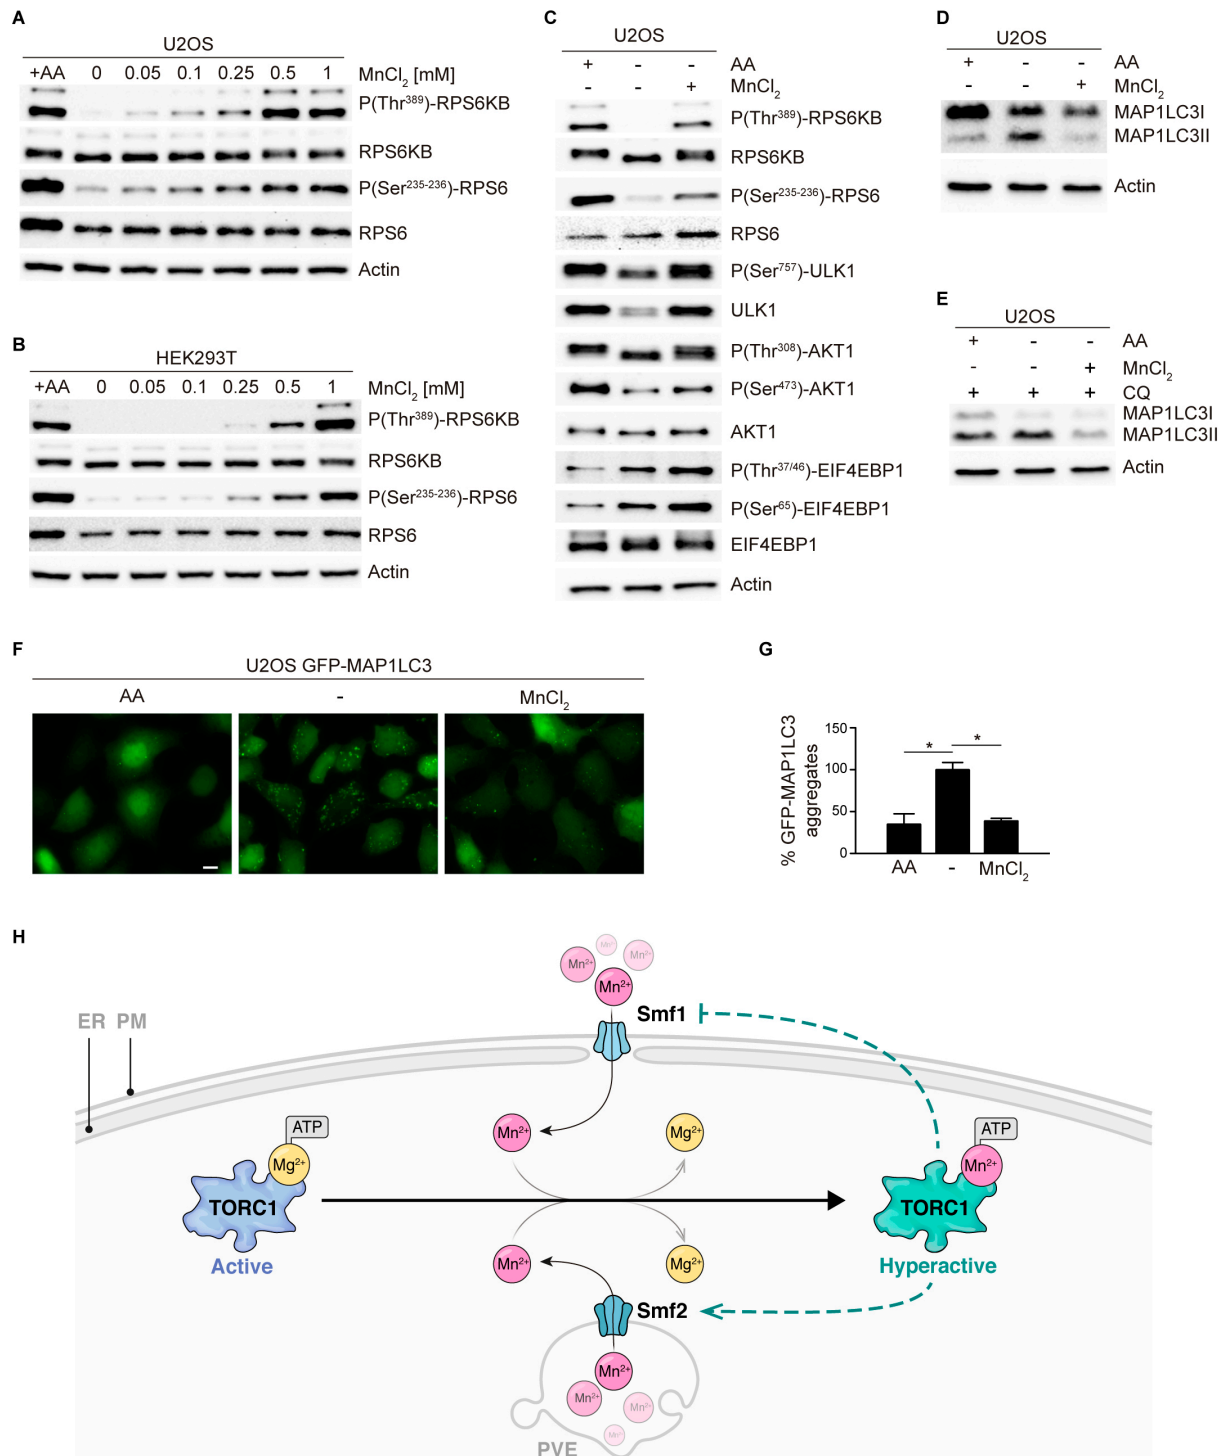

1

2

## 1 Discussion

2 Studies with yeast lacking the divalent Ca/Mn ion Golgi transporter Pmr1, which displays an increase in  
3 intracellular Mn<sup>2+</sup> levels due to impaired Mn<sup>2+</sup> detoxification (49), have pinpointed a functional link between  
4 Mn<sup>2+</sup> homeostasis and TORC1 signaling (33, 34). However, the underlying mechanism(s) of how Mn<sup>2+</sup>  
5 impinges on TORC1 has so far remained elusive. Our study identifies Mn<sup>2+</sup> as a divalent metal cofactor that  
6 stimulates the enzymatic activity of the TORC1 complex *in vitro* and suggests that Mn<sup>2+</sup> functions similarly  
7 *in vivo* both in yeast and mammalian cells. Our results support a model in which the PI3K-related protein  
8 kinase Tor1 is activated by Mg<sup>2+</sup>, but requires Mn<sup>2+</sup> as a metal cofactor for maximal activity as this allows it  
9 to better coordinate ATP (Figure 5H). While it seemingly shares this feature with PI3Ks (44–46),  
10 serine/threonine protein kinases are generally known to be preferably activated by Mg<sup>2+</sup> rather than Mn<sup>2+</sup>  
11 (60). We deem it therefore possible that the respective Mn<sup>2+</sup>-driven activation of TORC1 is more specifically  
12 related to the architecture of its catalytic center. Resolution of this issue will therefore require future  
13 molecular dynamic modeling and/or structural analyses.

14 Our current study also highlights a need for coordinated control of TORC1 activity and cytoplasmic  
15 Mn<sup>2+</sup> levels. The latter critically depend on a set of conserved NRAMP transporters, such as yeast Pmr1  
16 and Smf1/2, and their mammalian homologs ATP2C1/SPCA1 (38) and SLC11A2 (DMT1; (61) and this  
17 work). In yeast, cytoplasmic Mn levels can be increased by the loss of Pmr1, which causes a defect in  
18 sequestration of Mn<sup>2+</sup> in the Golgi. Alternatively, they can also be boosted by increased Smf1-mediated  
19 Mn<sup>2+</sup> uptake combined with Smf2-mediated Mn<sup>2+</sup> depletion in endosomes following the loss of Bsd2, an  
20 adaptor protein for the NEDD4 family E3 ubiquitin ligase Rsp5 (12) that normally favors vacuolar  
21 degradation of Smf1/2 (62, 63). In both cases, *i.e.* loss of Pmr1 or of Bsd2 (specifically upon addition of  
22 Mn<sup>2+</sup> in the medium), enhanced cytoplasmic Mn<sup>2+</sup> levels mediate higher TORC1 activity and hence the  
23 resistance of cells to low doses of rapamycin. Conversely, our expression and localization studies of GFP-  
24 Smf1 and Smf2-GFP indicate that TORC1, while being controlled by Mn<sup>2+</sup> levels, also employs feedback  
25 control mechanisms that regulate Smf1 expression and Smf2 turnover. These observations are consistent  
26 with the recent paradigm shift assigning TORC1 an essential role in cellular and organismal homeostasis  
27 (51) and extend this role of TORC1 to Mn metabolism. A more detailed understanding of these regulatory  
28 circuits involving TORC1 and NRAMP transporters (and *vice versa*) will, however, require future analyses  
29 of the specific subcellular pools of Mn<sup>2+</sup> within different organelles using electron-nuclear double resonance  
30 spectroscopy (49) or inductively coupled plasma mass spectrometry (64). Of note, Mn<sup>2+</sup> also acts as a  
31 cofactor for glutamine synthetase (3) that produces the TORC1-stimulating amino acid glutamine (65).  
32 Hence, Mn<sup>2+</sup> homeostasis, amino acid metabolism, and TORC1 may be subjected to even more intricate,  
33 multilayered feedback regulatory circuits.

1           Our finding that  $Mn^{2+}$  activates TORC1/mTORC1 may have important implications in different  
2 biological contexts. For instance, previous work has shown that chronic exposure to high levels of  $Mn^{2+}$   
3 causes autophagic dysfunction and hence accumulation of compromised mitochondria in mammalian  
4 astrocytes due to reduced nuclear localization of TFEB (transcription factor EB), a key transcription factor  
5 that coordinates the expression of genes involved in autophagy (66). Because mTORC1 inhibits TFEB (67)  
6 and mitochondrial quality can be improved by rapamycin-induced TFEB induction (and consequent  
7 stimulation of autophagy) (68), our study now provides a simple rationale for the observed accumulation of  
8 damaged mitochondria upon  $Mn^{2+}$  exposure. Accordingly, excess  $Mn^{2+}$  antagonizes autophagy and  
9 mitophagy at least in part through mTORC1 activation and subsequent TFEB inhibition, which prevents  
10 proper disposal of hazardous and reactive oxygen species-producing mitochondria. This model also  
11 matches well with our previous observation that rapamycin restricts cell death associated with anomalous  
12 mTORC1 hyperactivation (58). Finally, our data indicate that  $Mn^{2+}$ -driven TORC1 activation and the ensuing  
13 inhibition of auto- and mitophagy are also employed by yeast cells, which highlights the primordial nature of  
14 these processes.

15           Another area where our findings may be relevant relates to the use of  $Mn^{2+}$  to stimulate antitumor  
16 immune responses. Recent studies have shown that  $Mn^{2+}$  is indispensable for the host defense against  
17 cytosolic, viral double-stranded DNA as it mediates activation of the DNA sensor CGAS (cyclic GMP-AMP  
18 synthase) and its downstream adaptor protein STING1 (stimulator of interferon response cGAMP interactor  
19 1) (69). Since  $Mn^{2+}$  stimulates the innate immune sensing of tumors, Mn administration has been suggested  
20 to provide an anti-tumoral effect and improve the treatment of cancer patients (70). Nevertheless, mTOR  
21 (mechanistic target of rapamycin kinase) hyperactivation is known to promote tumor progression (71), and  
22 carcinoma and melanoma formation have previously been associated with mutations in the human *PMR1*  
23 ortholog *ATP2C1* that cause Hailey-Hailey disease (72). Based on our findings, it is therefore possible that  
24 tumor formation in these patients may be causally linked to  $Mn^{2+}$ -dependent DNA replication defects (16),  
25 stress response (73), and mTORC1 activation.

26           In addition to the potential relevance of our findings in the context of chronic  $Mn^{2+}$  exposure and  
27 immune stimulation, our findings may also provide new perspectives to our understanding of specific  
28 neuropathies. For instance, exposure to Mn dust or Mn containing smoke, as a byproduct of metal welding,  
29 is well known to cause a parkinsonian-like syndrome named manganism, a toxic condition of Mn poisoning  
30 with dyskinesia (74). Interestingly, while dyskinesia has been connected to L-dopamine-mediated activation  
31 of mTORC1 (75), our findings suggest that  $Mn^{2+}$ -driven mTORC1 hyperactivation may impair autophagy  
32 and thereby contribute to neurological diseases (76). In line with this reasoning, compounds that inhibit  
33 TORC1 activity, and thus stimulate autophagy, have been suggested as therapeutics for the treatment of  
34 Parkinson-like neurological symptoms (77). In this context, Huntington disease (HD) is another example of  
35 patients suffering from a proteinopathy characterized by parkinsonian-like neurological syndromes (78). In



1 HD patients, expansion of the polyglutamine tract in the N-terminus of the huntingtin protein leads to protein  
2 aggregation (79) and, intriguingly, HD patients exhibit reduced  $Mn^{2+}$  levels in the brain (80). This begs the  
3 question of whether the respective cells aim to evade Mn-driven mTORC1 activation, *e.g.* by reducing Mn  
4 uptake or sequestration of  $Mn^{2+}$  within organelles, to stimulate huntingtin protein degradation via autophagy.  
5 Finally,  $Mn^{2+}$  also contributes to prion formation in yeast (81), and elevated  $Mn^{2+}$  levels have been detected  
6 in the blood and the central nervous system of Creutzfeldt-Jakob patients (82). It will therefore be exciting  
7 to study the cell type-specific impact of  $Mn^{2+}$ -driven mTORC1 activation on metabolism, genome stability,  
8 checkpoint signaling, and the immune response, all processes that play a key role in neurological diseases  
9 and aging-related processes.

## 10 **Materials and Methods**

### 11 **Antibodies**

12 Primary antibodies against GFP (Clontech, JL-8; 1:5000), G-6-PDH (Sigma-Aldrich, A9521; 1:5000), Adh1  
13 (Calbiochem, 126745; 1:200000), RPS6 (Cell Signalling Technology, 2217; 1:1000), phospho-RPS6 (Ser<sup>235</sup>-  
14 <sup>236</sup>) (Cell Signalling Technology, 4856; 1:1000), RPS6KB (Cell Signalling Technology, 2708; 1:1000),  
15 phospho-RPS6KB (Thr<sup>389</sup>) (Cell Signalling Technology, 9205; 1:1000), EIF4EBP1 (Cell Signalling  
16 Technology, 9452; 1:1000), phospho-EIF4EBP1 (Thr<sup>37/46</sup>) (Cell Signalling Technology, 2855; 1:1000),  
17 phospho-EIF4EBP1 (Ser<sup>65</sup>) (Cell Signalling Technology, 9451; 1:1000), AKT1 (Cell Signalling Technology,  
18 4691; 1:1000), phospho-AKT(Ser<sup>473</sup>) (Cell Signalling Technology, 4060; 1:1000), phospho-AKT(Thr<sup>308</sup>) (Cell  
19 Signalling Technology, 13038; 1:1000), ULK1 (Cell Signalling Technology, 8359; 1:1000), phospho-ULK1  
20 (Cell Signalling Technology, 8359; 1:1000), MAP1LC3 AB (Cell Signalling Technology, 12741; 1:1000),  $\beta$ -  
21 actin (Cell Signalling Technology, 4967; 1:1000) were used.

### 22 **Yeast strains, Plasmids, and Growth Conditions**

23 Yeast strains and plasmids used in this study are listed in Tables S2 and S3. Gene disruption and tagging  
24 were performed with standard high-efficiency recombination methods. To generate strain MP6988, pSIVu-  
25 SMF1p-GFP-SMF1 was digested with *PacI* and transformed into *smf1* $\Delta$  strain YOL182C. Yeast cells were  
26 grown to mid-log phase in synthetic defined medium (SD; 0.17% yeast nitrogen base, 0.5% ammonium  
27 sulfate, 2% glucose, 0.2% drop-out mix) at 30°C. To induce autophagy, mitophagy, and Rtg1-Rtg3  
28 retrograde signaling, cells were treated with 200 ng/ml rapamycin (Biosynth Carbosynth, AE27685) for the  
29 indicated time. For telomere length analyses, cells were grown for 3 days in rich medium (YPAD; 1% yeast  
30 extract, 2% peptone, 2% glucose, 0.004% adenine sulfate) with or without the addition of 10 mM  $CaCl_2$ . For  
31 imaging of Rtg3-GFP, cells were grown at 26°C in SD-MSG-ura medium (0.17% yeast nitrogen base, 0.5%  
32 monosodium glutamate, 2% glucose, 0.2% drop-out mix -ura) to exponential phase and treated or not with

1 200 ng/ml rapamycin for 30 min. For GFP1-Smf1 and Smf2-GFP analyses, cells were grown in SD-ura  
2 medium. Overnight precultures were quickly spun and diluted into SD-ura medium devoid of manganese  
3 sulfate (0.19% yeast nitrogen base without manganese sulfate (Formedium; CYN2001), 0.5% ammonium  
4 sulfate, 2% glucose, and 0.2% drop-out mix -ura). After 5 to 6 h of growth, cells were treated with either  
5 rapamycin (200 ng/ml), cycloheximide (25 µg/ml), or both compounds for the indicated times.

#### 6 **Yeast Cell Lysate Preparation and Immunoblotting**

7 Cells grown to mid-log phase were treated with 6.7% trichloroacetic acid (TCA, final concentration), pelleted,  
8 washed with 99% acetone, dried, dissolved in urea buffer (6 M urea, 50 mM Tris-HCl pH 7.5, 1% SDS, 1  
9 mM PMSF and 10 mM NaF) and disrupted with glass beads using a Yasui Kikai homogenizer. Cell lysates  
10 were heated at 65° C for 10 min in Laemmli SDS sample buffer, centrifugated at 15'000 g for 1 min, and the  
11 supernatants were subjected to SDS-PAGE and immunoblotted. Heat denaturation of samples was omitted  
12 to detect GFP-Smf1 and Smf2-GFP. Chemiluminescence signals were captured in an Amersham  
13 ImageQuant 800 Imager and quantified with ImageQuant TL software (Cytiva).

#### 14 **Drug Sensitivity Assays**

15 Yeast cells grown to mid-log phase were adjusted to an initial  $A_{600}$  of 0.2, serially diluted 1:10, and spotted  
16 onto plates without or with rapamycin at the indicated concentrations (see figure legends). 1 mM  $MnCl_2$   
17 and/or 10 mM  $CaCl_2$  were added to the medium when indicated. Plates were then incubated at 30°C for 3  
18 to 4 days.

#### 19 **Analysis of Telomere Length**

20 Genomic DNA was isolated from yeast strains grown in YPAD for 3 days with or without the addition of 10  
21 mM  $CaCl_2$ . DNA was digested with *Xho*I, separated on a 1% agarose-Tris borate EDTA gel, transferred to  
22 a Hybond XL (Amersham Biosciences) membrane, and hybridized with a  $^{32}P$ -labeled DNA probe specific  
23 for the terminal Y' telomere fragment. The probe was generated by random hexanucleotide-primed DNA  
24 synthesis using a short Y' specific DNA template, which was generated by PCR from genomic yeast DNA  
25 using the primers Y up (5'-TGCCGTGCAACAAACTAAATCAA-3') and Y' low (5'-  
26 CGCTCGAGAAAGTTGGAGTTTTTCA-3'). Three independent colonies of each strain were analyzed to  
27 ensure reproducibility.

#### 28 ***In vitro* TORC1 kinase assays**

29 TORC1 was purified and kinase assays were performed as previously described (47) with minor  
30 modifications. For the kinase assays in the presence of various concentrations of magnesium or

1 manganese, reactions were performed in a total volume of 20  $\mu$ l with kinase buffer (50 mM HEPES/NaOH  
2 [pH 7.5], 150 mM NaCl), 400 ng of purified His<sub>6</sub>-Lst4<sup>L<sup>oop</sup></sup>, 60 ng TORC1 (quantified based on the Tor1  
3 subunit) and 640, 320, 160, 80, 40 or 20  $\mu$ M MgCl<sub>2</sub>/MnCl<sub>2</sub>. The reaction was started by adding 1.4  $\mu$ l of ATP  
4 mix (18 mM ATP, 3.3 mCi [ $\gamma$ -<sup>32</sup>P]-ATP [Hartmann Analytic, SRP-501]). For the kinase assays in the presence  
5 of various concentrations of ATP, reactions containing 4 mM MgCl<sub>2</sub>, 160  $\mu$ M MnCl<sub>2</sub>, or both were started by  
6 adding 1.4  $\mu$ l of stock ATP mix (5.7 mM ATP, 3.3 mCi [ $\gamma$ -<sup>32</sup>P]-ATP [Hartmann Analytic, SRP-501]) or two-  
7 fold serial dilutions. After the addition of sample buffer, proteins were separated by SDS-PAGE, stained with  
8 SYPRO Ruby (Sigma-Aldrich, S492) (loading control), and analyzed using a phosphoimager (Typhoon FLA  
9 9500; GE Healthcare). Band intensities were quantified with ImageJ and data were analyzed with GraphPad  
10 Prism using the Michaelis-Menten non-linear fitting.

## 11 **Cell culture**

12 U2OS and HEK293T cell lines were obtained from the American Type Culture Collection (ATCC). GFP-  
13 MAP1LC3 expressing U2OS cells were kindly provided by Dr. Eyal Gottlieb (Cancer research UK, Glasgow,  
14 UK). All the cell lines were grown in high glucose DMEM base medium (Sigma-Aldrich, D6546)  
15 supplemented with 10 % of fetal bovine serum, glutamine (2 mM), penicillin (Sigma-Aldrich, 100  $\mu$ g/ml), and  
16 streptomycin (100  $\mu$ g/ml), at 37 °C, 5 % CO<sub>2</sub> in a humidified atmosphere. Amino acid starvation was  
17 performed with EBSS medium (Sigma-Aldrich, E2888) supplemented with glucose at a final concentration  
18 of 4.5 g/L. When indicated, the starvation medium was complemented with MnCl<sub>2</sub> to a final concentration of  
19 0.05 -1 mM, chloroquine (Sigma-Aldrich; 10  $\mu$ M), and amino acids, by adding MEM Amino Acids (Sigma-  
20 Aldrich, M5550), plus MEM Non-essential Amino Acid Solution (Sigma-Aldrich, M7145) and glutamine (2  
21 mM).

## 22 **Confocal and fluorescence microscopy**

23 Yeast cells: For imaging of GFP-Tor1, GFP-Smf1 and Smf2-GFP, images were captured with an inverted  
24 spinning disk confocal microscope (Nikon Ti-E, VisiScope CSU-W1, Puchheim, Germany) that was  
25 equipped with an Evolve 512 EM-CDD camera (Photometrics), and a 100x 1.3 NA oil immersion Nikon CFI  
26 series objective (Egg, Switzerland). Images were then processed using the FIJI-ImageJ software. For  
27 imaging of Rtg3-GFP, images were obtained by projection of a focal plane image derived from wide-field  
28 fluorescence microscopy (DM-6000B, Leica) at 100x magnification using L5 filters and a digital charge-  
29 coupled device camera (DFC350, Leica). Pictures were processed with LAS AF (Leica).

30 Human cells: 8 x 10<sup>5</sup> cells were grown in coverslips for 24h and treated for 4h as indicated. Thereafter, cells  
31 were fixed with 4% paraformaldehyde (Sigma-Aldrich) in PBS for 10 min at room temperature. For GFP-  
32 MAP1LC3 assessment, after three washes with PBS, coverslips were mounted with Prolong containing

1 DAPI (Invitrogen). Samples were imaged with a Zeiss Apotome microscope. GFP aggregation in microscopy  
2 images was assessed using ImageJ software.

### 3 **Statistical analyses**

4 Statistical analyses were performed using GraphPad Prism 7.0. Statistical significance was determined from  
5 at least 3 independent biological replicates using either Student's t-test, or ANOVA followed by Tukey's  
6 multiple comparison test. Differences with a P-value lower than 0.05 were considered significant. \*  $p < 0.05$ ;  
7 \*\*  $p < 0.01$ ; \*\*\*  $p < 0.001$ ; \*\*\*\*  $p < 0.0001$ . The number of independent experiments (n), specific statistical tests  
8 and significance are described in the figure legends.

### 9 **Acknowledgments**

10 We thank María Díaz de la Loza for scientific illustration work, and V. Albanèse, E. de Nadal, V. Goder, K.  
11 D. Hirschi, C. Ungermann, and E. Gottlieb for plasmids, yeast strains, and cell lines. Research was funded  
12 by grants from the University of Seville (2020/00001326), Junta de Andalucía/European Union Regional  
13 Funds (P20-RT-01220) and EMBO (STF-8685) to R.E.W.; the Swiss National Science Foundation  
14 (310030\_166474/184671) to C.D.V.; the Spanish Ministry of Science, Innovation and Universities  
15 (PGC2018-096244-B-I00) to R.D. The author L.Z. was the recipient of a predoctoral grant from the Spanish  
16 Ministry of Science, Innovation and Universities (FPU19/04914).

### 17 **Disclosure statement**

18 No potential conflict of interest was reported by the authors

### 19 **References**

- 20
- 21 1. R. A. Weisiger, I. Fridovich, Mitochondrial Superoxide Dismutase. *J. Biol. Chem.* **248**, 4793–4796  
22 (1973).
  - 23 2. D. W. Chan, *et al.*, Purification and Characterization of ATM from Human Placenta. *J. Biol. Chem.*  
24 **275**, 7803–7810 (2000).
  - 25 3. F. C. Wedler, R. B. Denman, Glutamine synthetase: the major Mn(II) enzyme in mammalian brain.  
26 *Curr. Top. Cell. Regul.* **24**, 153–169 (1984).
  - 27 4. Couper, J., On the effects of black oxide of manganese when inhaled into the lungs. *Br Ann Med*  
28 *Pharm.* **1**, 41–42 (1837).

- 1 5. J. D. Aguirre, V. C. Culotta, Battles with Iron: Manganese in Oxidative Stress Protection. *J. Biol.*  
2 *Chem.* **287**, 13541–13548 (2012).
- 3 6. D. S. Harischandra, *et al.*, Manganese-Induced Neurotoxicity: New Insights Into the Triad of  
4 Protein Misfolding, Mitochondrial Impairment, and Neuroinflammation. *Front. Neurosci.* **13** (2019).
- 5 7. K. J. Horning, S. W. Caito, K. G. Tipps, A. B. Bowman, M. Aschner, Manganese Is Essential for  
6 Neuronal Health. *Annu. Rev. Nutr.* **35**, 71–108 (2015).
- 7 8. F. Supek, L. Supekova, H. Nelson, N. Nelson, A yeast manganese transporter related to the  
8 macrophage protein involved in conferring resistance to mycobacteria. *Proc. Natl. Acad. Sci.* **93**,  
9 5105–5110 (1996).
- 10 9. A. Sacher, A. Cohen, N. Nelson, Metal ion transporters from yeast to human diseases. *Comp.*  
11 *Biochem. Physiol. Part A Mol. Integr. Physiol.* **126**, 109 (2000).
- 12 10. X. F. Liu, V. C. Culotta, Post-translation Control of Nramp Metal Transport in Yeast. *J. Biol. Chem.*  
13 **274**, 4863–4868 (1999).
- 14 11. L. Eguez, Y.-S. Chung, A. Kuchibhatla, M. Paidhungat, S. Garrett, Yeast Mn<sup>2+</sup> Transporter,  
15 Smf1p, Is Regulated by Ubiquitin-Dependent Vacuolar Protein Sorting. *Genetics* **167**, 107–117  
16 (2004).
- 17 12. X. F. Liu, F. Supek, N. Nelson, V. C. Culotta, Negative Control of Heavy Metal Uptake by the  
18 *Saccharomyces cerevisiae* BSD2 Gene. *J. Biol. Chem.* **272**, 11763–11769 (1997).
- 19 13. A. Moreno-Cermeño, *et al.*, Frataxin Depletion in Yeast Triggers Up-regulation of Iron Transport  
20 Systems before Affecting Iron-Sulfur Enzyme Activities. *J. Biol. Chem.* **285**, 41653–41664 (2010).
- 21 14. P. J. Lapinskas, K. W. Cunningham, X. F. Liu, G. R. Fink, V. C. Culotta, Mutations in PMR1  
22 suppress oxidative damage in yeast cells lacking superoxide dismutase. *Mol. Cell. Biol.* **15**, 1382–  
23 1388 (1995).
- 24 15. N. F. Lue, *et al.*, Telomerase can act as a template- and RNA-independent terminal transferase.  
25 *Proc. Natl. Acad. Sci.* **102** (2005).
- 26 16. N. García-Rodríguez, *et al.*, Impaired Manganese Metabolism Causes Mitotic Misregulation. *J.*  
27 *Biol. Chem.* **287**, 18717–18729 (2012).

- 1 17. E. C. Bolton, A. S. Mildvan, J. D. Boeke, Inhibition of reverse transcription in vivo by elevated  
2 manganese ion concentration. *Mol. Cell* **9**, 879–889 (2002).
- 3 18. V. Albert, M. N. Hall, mTOR signaling in cellular and organismal energetics. *Curr. Opin. Cell Biol.*  
4 **33**, 55–66 (2015).
- 5 19. M. Laplante, D. M. Sabatini, mTOR Signaling in Growth Control and Disease. *Cell* **149**, 274–293  
6 (2012).
- 7 20. Y. Sancak, *et al.*, The Rag GTPases Bind Raptor and Mediate Amino Acid Signaling to mTORC1.  
8 *Science (80-. )*. **320**, 1496–1501 (2008).
- 9 21. G. Y. Liu, D. M. Sabatini, mTOR at the nexus of nutrition, growth, ageing and disease. *Nat. Rev.*  
10 *Mol. Cell Biol.* **21**, 183–203 (2020).
- 11 22. J. Heitman, N. R. Movva, M. N. Hall, Targets for Cell Cycle Arrest by the Immunosuppressant  
12 Rapamycin in Yeast. *Science (80-. )*. **253**, 905–909 (1991).
- 13 23. R. Hatakeyama, *et al.*, Spatially Distinct Pools of TORC1 Balance Protein Homeostasis. *Mol. Cell*  
14 **73**, 325-338.e8 (2019).
- 15 24. C. Betz, M. N. Hall, Where is mTOR and what is it doing there? *J. Cell Biol.* **203**, 563–574 (2013).
- 16 25. M. Tanigawa, *et al.*, A glutamine sensor that directly activates TORC1. *Commun. Biol.* **4**, 1093  
17 (2021).
- 18 26. R. Nicastro, A. Sardu, N. Panchaud, C. De Virgilio, The Architecture of the Rag GTPase Signaling  
19 Network. *Biomolecules* **7**, 48 (2017).
- 20 27. K. P. Wedaman, *et al.*, Tor Kinases Are in Distinct Membrane-associated Protein Complexes in  
21 *Saccharomyces cerevisiae*. *Mol. Biol. Cell* **14**, 1204–1220 (2003).
- 22 28. Y. Sancak, *et al.*, Regulator-Rag Complex Targets mTORC1 to the Lysosomal Surface and Is  
23 Necessary for Its Activation by Amino Acids. *Cell* **141**, 290–303 (2010).
- 24 29. M. Binda, *et al.*, The Vam6 GEF Controls TORC1 by Activating the EGO Complex. *Mol. Cell* **35**,  
25 563–573 (2009).
- 26 30. M. Bayeva, *et al.*, mTOR regulates cellular iron homeostasis through tristetraprolin. *Cell Metab.* **16**,

- 1 645–657 (2012).
- 2 31. G. J. Brunn, *et al.*, Direct inhibition of the signaling functions of the mammalian target of rapamycin  
3 by the phosphoinositide 3-kinase inhibitors, wortmannin and LY294002. *EMBO J.* **15**, 5256–5267  
4 (1996).
- 5 32. D. J. Withers, *et al.*, Expression, enzyme activity, and subcellular localization of mammalian target  
6 of rapamycin in insulin-responsive cells. *Biochem. Biophys. Res. Commun.* **241**, 704–709 (1997).
- 7 33. G. Devasahayam, D. J. Burke, T. W. Sturgill, Golgi Manganese Transport Is Required for  
8 Rapamycin Signaling in *Saccharomyces cerevisiae*. *Genetics* **177**, 231–238 (2007).
- 9 34. G. Devasahayam, D. Ritz, S. B. Helliwell, D. J. Burke, T. W. Sturgill, Pmr1, a Golgi Ca<sup>2+</sup>/Mn<sup>2+</sup>-  
10 ATPase, is a regulator of the target of rapamycin (TOR) signaling pathway in yeast. *Proc. Natl.*  
11 *Acad. Sci.* **103**, 17840–17845 (2006).
- 12 35. R. J. Kaufman, M. Swaroop, P. Murtha-Riel, Depletion of Manganese within the Secretory Pathway  
13 Inhibits O-Linked Glycosylation in Mammalian Cells. *Biochemistry* **33**, 9813–9819 (1994).
- 14 36. E. E.-C. Luk, V. C. Culotta, Manganese Superoxide Dismutase in *Saccharomyces cerevisiae*  
15 Acquires Its Metal Co-factor through a Pathway Involving the Nramp Metal Transporter, Smf2p. *J.*  
16 *Biol. Chem.* **276**, 47556–47562 (2001).
- 17 37. N. García-Rodríguez, *et al.*, Manganese Redistribution by Calcium-stimulated Vesicle Trafficking  
18 Bypasses the Need for P-type ATPase Function. *J. Biol. Chem.* **290**, 9335–9347 (2015).
- 19 38. D. Muncanovic, M. H. Justesen, S. S. Preisler, P. A. Pedersen, Characterization of Hailey-Hailey  
20 Disease-mutants in presence and absence of wild type SPCA1 using *Saccharomyces cerevisiae*  
21 as model organism. *Sci. Rep.* **9**, 12442 (2019).
- 22 39. T. Kanki, K. Wang, D. J. Klionsky, A genomic screen for yeast mutants defective in mitophagy.  
23 *Autophagy* **6**, 278–280 (2010).
- 24 40. H. Cheong, D. J. Klionsky, Biochemical methods to monitor autophagy-related processes in yeast.  
25 *Methods Enzymol.* **451**, 1–26 (2009).
- 26 41. T. Kanki, D. Kang, D. J. Klionsky, Monitoring mitophagy in yeast: The Om45-GFP processing  
27 assay. *Autophagy* **5**, 1186–1189 (2009).

- 1 42. C. Ruiz-Roig, N. Noriega, A. Duch, F. Posas, E. de Nadal, The Hog1 SAPK controls the Rtg1/Rtg3  
2 transcriptional complex activity by multiple regulatory mechanisms. *Mol. Biol. Cell* **23**, 4286–4296  
3 (2012).
- 4 43. C. M. Alarcon, J. Heitman, M. E. Cardenas, Protein Kinase Activity and Identification of a Toxic  
5 Effector Domain of the Target of Rapamycin TOR Proteins in Yeast. *Mol. Biol. Cell* **10**, 2531–2546  
6 (1999).
- 7 44. R. Dhand, *et al.*, PI 3-kinase is a dual specificity enzyme: autoregulation by an intrinsic protein-  
8 serine kinase activity. *EMBO J.* **13**, 522–533 (1994).
- 9 45. L. C. Foukas, C. A. Beeton, J. Jensen, W. A. Phillips, P. R. Shepherd, Regulation of  
10 phosphoinositide 3-kinase by its intrinsic serine kinase activity in vivo. *Mol. Cell. Biol.* **24**, 966–975  
11 (2004).
- 12 46. C. L. Carpenter, *et al.*, A tightly associated serine/threonine protein kinase regulates  
13 phosphoinositide 3-kinase activity. *Mol. Cell. Biol.* **13**, 1657–1665 (1993).
- 14 47. R. Nicastro, *et al.*, Indole-3-acetic acid is a physiological inhibitor of TORC1 in yeast. *PLOS Genet.*  
15 **17**, e1009414 (2021).
- 16 48. K. Van Eunen, *et al.*, Measuring enzyme activities under standardized in vivo-like conditions for  
17 systems biology. *FEBS J.* **277**, 749–760 (2010).
- 18 49. R. L. McNaughton, *et al.*, Probing in vivo Mn<sup>2+</sup> speciation and oxidative stress resistance in yeast  
19 cells with electron-nuclear double resonance spectroscopy. *Proc. Natl. Acad. Sci.* **107**, 15335–  
20 15339 (2010).
- 21 50. X. F. Liu, V. C. Culotta, The requirement for yeast superoxide dismutase is bypassed through  
22 mutations in BSD2, a novel metal homeostasis gene. *Mol. Cell. Biol.* **14**, 7037–7045 (1994).
- 23 51. S. Eltschinger, R. Loewith, TOR Complexes and the Maintenance of Cellular Homeostasis. *Trends*  
24 *Cell Biol.* **26**, 148–159 (2016).
- 25 52. A. Reinke, J. C. Y. Chen, S. Aronova, T. Powers, Caffeine targets TOR complex I and provides  
26 evidence for a regulatory link between the FRB and kinase domains of Tor1p. *J. Biol. Chem.* **281**,  
27 31616–31626 (2006).



- 1 53. R. Hatakeyama, *et al.*, Spatially Distinct Pools of TORC1 Balance Protein Homeostasis. *Mol. Cell*  
2 **73**, 325-338.e8 (2019).
- 3 54. C. Bodineau, *et al.*, Two parallel pathways connect glutamine metabolism and mTORC1 activity to  
4 regulate glutamoptosis. *Nat. Commun.* **12**, 4814 (2021).
- 5 55. M. R. Bryan, *et al.*, Phosphatidylinositol 3 kinase (PI3K) modulates manganese homeostasis and  
6 manganese-induced cell signaling in a murine striatal cell line. *Neurotoxicology* **64**, 185–194  
7 (2018).
- 8 56. C. Gaubitz, M. Prouteau, B. Kusmider, R. Loewith, TORC2 Structure and Function. *Trends*  
9 *Biochem. Sci.* **41**, 532–545 (2016).
- 10 57. T. Noda, Y. Ohsumi, Tor, a Phosphatidylinositol Kinase Homologue, Controls Autophagy in Yeast.  
11 *J. Biol. Chem.* **273**, 3963–3966 (1998).
- 12 58. V. H. Villar, *et al.*, mTORC1 inhibition in cancer cells protects from glutaminolysis-mediated  
13 apoptosis during nutrient limitation. *Nat. Commun.* **8**, 14124 (2017).
- 14 59. D. J. Klionsky, *et al.*, Guidelines for the use and interpretation of assays for monitoring autophagy  
15 (3rd edition). *Autophagy* **12**, 1–222 (2016).
- 16 60. M. J. Knape, *et al.*, Divalent metal ions control activity and inhibition of protein kinases. *Metallomics*  
17 **9**, 1576–1584 (2017).
- 18 61. Y. Nevo, N. Nelson, The NRAMP family of metal-ion transporters. *Biochim. Biophys. Acta - Mol.*  
19 *Cell Res.* **1763**, 609–620 (2006).
- 20 62. L. T. Jensen, *et al.*, Down-Regulation of a Manganese Transporter in the Face of Metal Toxicity.  
21 *Mol. Biol. Cell* **20**, 2810–2819 (2009).
- 22 63. M. E. Portnoy, X. F. Liu, V. C. Culotta, *Saccharomyces cerevisiae* Expresses Three Functionally  
23 Distinct Homologues of the Nramp Family of Metal Transporters. *Mol. Cell. Biol.* **20**, 7893–7902  
24 (2000).
- 25 64. Z. Liu, A. Xue, H. Chen, S. Li, Quantitative determination of trace metals in single yeast cells by  
26 time-resolved ICP-MS using dissolved standards for calibration. *Appl. Microbiol. Biotechnol.* **103**,  
27 1475–1483 (2019).

- 1 65. J. L. Jewell, *et al.*, Differential regulation of mTORC1 by leucine and glutamine. *Science* (80-. ).  
2 **347**, 194–198 (2015).
- 3 66. Z. Zhang, *et al.*, Dysregulation of TFEB contributes to manganese-induced autophagic failure and  
4 mitochondrial dysfunction in astrocytes. *Autophagy* **16**, 1506–1523 (2020).
- 5 67. C. Settembre, *et al.*, A lysosome-to-nucleus signalling mechanism senses and regulates the  
6 lysosome via mTOR and TFEB. *EMBO J.* **31**, 1095–1108 (2012).
- 7 68. A. Siddiqui, *et al.*, Mitochondrial Quality Control via the PGC1 -TFEB Signaling Pathway Is  
8 Compromised by Parkin Q311X Mutation But Independently Restored by Rapamycin. *J. Neurosci.*  
9 **35** (2015).
- 10 69. C. Wang, *et al.*, Manganese Increases the Sensitivity of the cGAS-STING Pathway for Double-  
11 Stranded DNA and Is Required for the Host Defense against DNA Viruses. *Immunity* **48**, 675-  
12 687.e7 (2018).
- 13 70. M. Lv, *et al.*, Manganese is critical for antitumor immune responses via cGAS-STING and improves  
14 the efficacy of clinical immunotherapy. *Cell Res.* **30**, 966–979 (2020).
- 15 71. D. Mossmann, S. Park, M. N. Hall, mTOR signalling and cellular metabolism are mutual  
16 determinants in cancer. *Nat. Rev. Cancer* **18**, 744–757 (2018).
- 17 72. M. R. Mohr, *et al.*, Two Patients With Hailey-Hailey Disease, Multiple Primary Melanomas, and  
18 Other Cancers. *Arch. Dermatol.* **147**, 211 (2011).
- 19 73. S. Cialfi, *et al.*, The loss of ATP2C1 impairs the DNA damage response and induces altered skin  
20 homeostasis: Consequences for epidermal biology in Hailey-Hailey disease. *Sci. Rep.* **6**, 31567  
21 (2016).
- 22 74. B. A. Racette, *et al.*, Welding-related parkinsonism. *Neurology* **56**, 8–13 (2001).
- 23 75. E. Santini, M. Heiman, P. Greengard, E. Valjent, G. Fisone, Inhibition of mTOR Signaling in  
24 Parkinson’s Disease Prevents L-DOPA–Induced Dyskinesia. *Sci. Signal.* **2** (2009).
- 25 76. J. Cheng, *et al.*, Microglial autophagy defect causes parkinson disease-like symptoms by  
26 accelerating inflammasome activation in mice. *Autophagy* **16**, 2193–2205 (2020).

- 1 77. B. Ravikumar, *et al.*, Inhibition of mTOR induces autophagy and reduces toxicity of polyglutamine  
2 expansions in fly and mouse models of Huntington disease. *Nat. Genet.* **36**, 585–595 (2004).
- 3 78. P. McColgan, S. J. Tabrizi, Huntington’s disease: a clinical review. *Eur. J. Neurol.* **25**, 24–34  
4 (2018).
- 5 79. M. E. MacDonald, *et al.*, A novel gene containing a trinucleotide repeat that is expanded and  
6 unstable on Huntington’s disease chromosomes. *Cell* **72**, 971–983 (1993).
- 7 80. A. B. Bowman, G. F. Kwakye, E. Herrero Hernández, M. Aschner, Role of manganese in  
8 neurodegenerative diseases. *J. Trace Elem. Med. Biol.* **25**, 191–203 (2011).
- 9 81. S. Chakrabortee, *et al.*, Intrinsically Disordered Proteins Drive Emergence and Inheritance of  
10 Biological Traits. *Cell* **167**, 369–381.e12 (2016).
- 11 82. S. Hesketh, J. Sassoon, R. Knight, D. R. Brown, Elevated manganese levels in blood and CNS in  
12 human prion disease. *Mol. Cell. Neurosci.* **37**, 590–598 (2008).

13
